# Supplementary material
Source: Springer Nature journal article supplement (https://www.springermedizin.de/resource/supplementary/12937_2010_320_MOESM3_ESM.doc/25654860)
Supplement: MOESM3 [file 25654860]

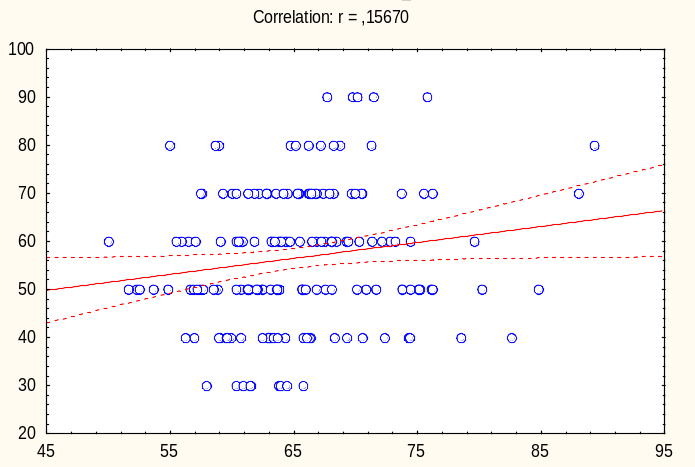


**IAS**

HEI

% Lean Mass

**Figure 3: Correlation of Health Eating Index (HEI) and % lean mass in 173 postmenopausal women (r= 0,157, p=0.04)*.**

*Statistical significance p < 0.05 (Pearson’s correlation)
